# Supplementary material for: Analysis of codon usage patterns of the chloroplast genome in Delphinium grandiflorum L. reveals a preference for AT-ending codons as a result of major selection constraints
Source: PeerJ. 2021 Jan 18;9:e10787. doi: 10.7717/peerj.10787 (PMC7819120; doi:10.7717/peerj.10787)
Supplement: Supplemental Information 1 [file peerj-09-10787-s001.xlsx]

## Sheet: S2-1_scaffold_mf_gene
>trnW-CCA_scaffold-blatN
GCGCTCTTAGTTCAGTTCGGTAGAACGCGGGTCTCCAAAACCCGATGTCGTAGGTTCAAATCCTACAGAGCGTG
>trnH-GUG_scaffold-blatN
GGCGGATGTAGCCAAGTGGATTAAGGCAGTGGATTGTGAATCCACTATGCGCGGGTTCAATTCCCGTCGTTCGCC
>ndhK_scaffold-blatX
ATGAATTCCATTGAGTTTCCGTTACTTGATCGAACAACCCAAAATTCAGTTATTTCAACTACATCAAATGATCTTTCGAATTGGTCAAGACTCTCCAGTTTATGGCCGCTTCTCTATGGTACCAGTTGTTGCTTCATTGAATTTGCTTCATTAATAGGCTCACGATTCGACTTTGATCGTTATGGACTGGTACCAAGGTCAAGTCCTAGACAAGCGGACCTCATTTTAACAGCGGGCACAGTAACTATGAAAATGGCTCCTTCTTTAGTGAGATTATATGAGCAAATGCCTGAACCAAAATATGTCATTGCTATGGGAGCCTGTACTATTACAGGAGGGATGTTCAGCACCGATTCTTATAGTACTGTTCGGGGAGTCGATAAGCTAATTCCTGTCGAT…
>accD_scaffold-blatX
ATGGAAAAATGGCGGTTCAATTCGATATTGTCTAAGGAGGAGTTAGAACACAGGTGTGGGCTAAGTAAATCGCTAGAAGGTATTGGTCCCATTGAAAATACCAATGGGGGTGAAGACCCCCTTATAAATAATATGATTCATGATTGGGTTGATAGTGACAGCTCTAATAACGTTGATCATTTATTCGGTGTCAGCGACATTCGGAGTTTTATTTCGGATGACACTTTTTTAGTTAGGGGTAGTAATGGTGAAAATTATTCCATATTTTTTGATATTGAAAATATGATTTTTGAGATTGAAGACGATCGTTCTTTTCTGAGTGAACTGGAAAGTTTTTTTTCTAGTTATCTAAATTCTATTTATCCGAATGATGGGTCTAAGAGTGACAATCACTCCTAT…
>matK_scaffold-blatX
ATGGAGGAATTCCAAGGATATTTAAAGATAGATAGATCTCGAGAACGAGACTTCCTATATCCACTTCTCTTTCAGGAATATATTTATGCACTTGTTCATGATCATGGGTTAAATAAATCGATTCCTTATGAGCCTATGGAAAATTTGGGTTATGACAATAAATATAGTTTACTAATTGTTAAACGTTTAATTACTCGAATGTATCAACAGAAGCATTTTATTTTTTTGGCTAATGATTCGAATCAAAATAAATTTGTTGGGCATAATAAAATTTTGGATTCTCAAATGATATCAGAGGGGTTTGCAGTCATTGTGGAAATTCCATTCTCACTGCGATTAGTATCTTCCCTAGAGGGTAAAAAAGAAATAGTCAAATCTATTAATTTACGATCAATTCAT…
>rps18_scaffold-blatX
ATGGATAAATCCAAGCGACTTTTTCTTAAATCCAAGCGATCTTTTCGTAGGCGTTTGCCCCCAATTGGGTCGGGGGATCGAATTGATTATAGAAACATGAGTTTAATTAGTCGATTTATTAGTGAACAAGGAAAAATATTATCTAGACGAGTGAATAGATTGACGTTGAAACAACAACGATTAATTACTATTGCTATAAAACAAGCTCGTATTTTATCTTTGTTACCTTTTCTTAATAATGAGAAACAATTTGAGAGAACTGAGTCGACTCCTAGAACTACGGGTCCTCGAACTAGAAATAAATAG
>atpI_scaffold-blatX
ATGAATGTTCTACCATGTTCCATCAACACATTAAAAAGGTTATACGATATATCCGGTGTAGAAGTAGGCCAACATTTCTATTGGCAAATAGGGGGTTTCCAAGTCCATGCCCAAGTACTTATTACTTCTTGGTTCGTAATTGCTATCTTATTAGGTTCCGCTACTATAGCTGTTCGGAATCCACAAACCATTCCGACCGATGGTCAGAATTTCTTCGAATATGTCCTTGAATTCATTCGAGACTTGAGCAAAACTCAAATTGGAGAAGAATACGGTCCATGGGTTCCTTTTATTGGAACTATGTTCTTATTTATTTTTGTTTCCAACTGGTCGGGTGCTCTTTTACCTTGGAAAATAATACAGTTACCTCATGGGGAGTTAGCCGCACCCACGAATGAT…
>clpP_scaffold-blatX
ATGCCTATTGGTGTTCCAAAAGTACCTTTTCGGATTCCCGGACAGGAAGATGCAACTTGGGTTGACGTATAGTGCGACTTGTCAGACATATTGGGTCATATGGGAGTTCCCCGTTTTCTCCCCCGATCGAGATACCCTCTGTTTCGTCCAAAAAAGATTGCTTGAAAACCATCAATAATTTGGAGCGTGAAGTGCAATTAGATCCATTTTTTGGGGGGTCGAGATCAATATTAATATTAACCATTATAAAAATTTATGGTTGGCTTGGTTGGACCAATAAAATGAAGTATCCAGGCTCCGTTCAGAAAATACCCAATTCAATTGGTAATATATGTATGATTACCACTTCTATCATACCATACATAAGTCATTACTTTATAGCATATGAACGATCTCAAA…
>rrn5-II_scaffold-blatN
TATTCTGGTGTCCTAGGCGTAGAGGAACCACACCAATCCATCCCGAACTTGGTGGTTAAACTCTACTGCGGTGACGATACTGTAGGGGAGGTCCTGCGGAAAAATAGCTCGACGCCAGGAT
>ycf4_scaffold-blatX
ATGAACTGGCGATCAGAGCGTATATGGATAGAACTTATAGCGGGGTCTCGAAAAACAAGTAATTTCTGTTGGGCTTGTATCCTTTTTTTAGGTTCACTGGGATTCTTATTGGTTGGAACTTCTAGTTATCTTGGTAGGAATTTGATATCCTTATTTCCTTCTCAGCAAATCCTTTTTTTTCCACAAGGTATCGTGATGTCTTTCTACGGGATCGCGGGTCTGTTCATTAGCTCCTATTTGTGGTGCACAATTTCGTGGAATGTAGGTAGTGGTTATGATAGATTCGATAGAAAAAAAGGAATAGTGTGTATTTTTCGTTGGGGATTCCCTGGAAGAAATCGTCGCATATTCCTTCGATTCCTTATGAAAGATATCCAGTCAATTAGAATAGAGGTTAAG…
>trnT-UGU_scaffold-blatN
GCCCGCTTAGCTCAGAGGTTAGAGCATCGCATTTGTAATGCGATGGTCATCGGTTCGATTCCGATAGCCGGCT
>rps8_scaffold-blatX
ATGGGCAGGGACACTATTGCTGAAATAATAACTTCTATACGAAATGCTGACATGGATAAAAAAGGAACGGTTCGAATAGCATCTACAAATATCACCGAAAACATTGTTAAAATACTTCTACGAGAAGGCTTTATCGAAAATGTGAGAAAACATCGAGTAAGCAATAAATTTTTCTTGGTTTCAACTCTGCGACATAGAAGGAATAGAAAAGGACCATATAGAACTGTTTTAAAACGTATCAGCCGACCCGGCCTACGAATCTATTCCAACTATCAACGAATTCCTAGGATTTTAGGAGGAATGGGTATTGTAATTCTTTCTACTTCTCGAGGTATAATGACAGACCGAGAGGCTCGACTAGAAGGAATCGGAGGAGAAATTTTGTGTTATATATGGTGA
>rrn16-I_scaffold-blatN
AAAGGAGGTGATCCAGCCGCACCTTCCAGTACGGCTACCTTGTTACGACTTCACTCCAGTCACTAGCCCTGCCTTCGGCATCCCCCTCCTTGCGGTTAAGGTAACGACTTCGGGCATGGCCAGCTCCCATAGTGTGACGGGCGGTGTGTACAAGGCCCGGGAACGAATTCACCGCCGTATGGCTGACCGGCGATTACTAGCGATTCCGGCTTCATGCAGGCGAGTTGCAGCCTGCAATCCGAACTGAGGACGGGTTTTTGGGGTTAGCTCACCCTCGCGGGATCGCGACCCTTTGTCCCGGCCATTGTAGCACGTGTGTCGCCCAGGGCATAAGGGGCATGATGACTTGACGTCATCCTCACCTTCCTCCGGCTTATCACCGGCAGTCTGTTCAGGGTT…
>rps3_scaffold-blatX
ATGGGACAAAAAATAAATCCACTCGGTTTCAGACTTGGTACAACCCAAAGTCATCATTCTGTTTGGTTTGCACAACCAAAAAGTTATTCCGAAGGTCTCCAGGAAGATCAAAAAATACAGGATTGTATCAAGAATTATGTAAAAAAAAATAGGAAAATATCCTCCGGCGTCGAAGGAATTGCATGCATAAAGATTCAAAAAAGAATCGATTTGATCCAGGTCATAATATATATGGGATTCCCAAAATTGTTAATAGAGGGCAGCCCACGAGGAATCGAAGAATTACAAAGCAATGTACAAAAAGAATTTAATTCTGTCAACCGAAAACTTAACATTGCTATCACAAGAGTTGCAAAACCTTACGGACAACCTAATATTCTTGCAGAATTTATAGCCGGA…
>petL_scaffold-blatX
ATGCCTACTACAACTAGTTATTTCGGTTTTCTACTGGTGGCTTTAACTATAACTTCAGCTCTATTTATTGGTCTGAGCAAGATACGACTTATTTGA
>trnR-ACG_scaffold-blatN
GGGCCTGTAGCTCAGAGGATTAGAGCACGTGGCTACGAACCACGGTGTCGGGGGTTCGAATCCCTCCTCGCCCA
>psbN_scaffold-blatX
ATGGAAACAGCAACCCTAGTCGCCATCTTTATATCTGGTTTACTTGTAAGTTTTACCGGGTACGCCTTATATACCGCTTTTGGGCAACCCTCTCAACAACTAAGAGATCCATTCGAGGAACACGGGGACTAG
>psbI_scaffold-blatX
ATGCTTACTCTCAAACTCTTCGTTTACACAGTGGTGATATTCTTTGTTTCTCTCTTCATCTTCGGATTCCTATCTAATGATCCAGGACGTAATCCTGGACGTGAGGAATAA
>rps16_scaffold-blatX
GTGGTAAAACATCGTTTAAAACGATGTGGTAGAAAGCAACGTGCGACTTGAAGGACATGATCGGTTGTGGATTCTTACATTTTATTTTTCTTTTATATAGGAATTATGAGGCGCTCTCGACTCGAAATAGTTTGTTCTGTTCTACTAGAACTCCCAACCAAATGGCAGTTCAAGTAAATAGTACACGACGGAGCTCGGGCGGAAAGGATTAATTCATTTCTCAGAGGTAAGGATCTAGGGTTAATGTCAATCAATAAGTCGGAACAACTTCATTTACATATCTTCGATATAGAAATTGAAAAGATTCAATTCTAACAAAGTCCCCTTTTGGATTTGAAACTTTTGTTGAAATTGGAAAAACTATTTCGATCAAAAGTGTATCACACGGGAATCAATCGT…
>petA_scaffold-blatX
ATGCAAAATAGAAATATCTTTTCTTGGATAAAGGAACAGGTGACTCGATCCATTTCCGTATCGATCATTATATTTATATATGTAATAACTTGGACATCTATTTCACATGCATATCCTATTTTTGCGCAACAGAGTTATGAAAATCCACGAGAAGCAACTGGGCGTATTGTATGCGCCAATTGTCATTTAGCTAATAAGCCCGTGGATATTGAGGTTCCACAAGCCGTACTTCCTGATACTGTATTTGAAGCAGTTGTTAGAATTCCTTATGATATCCAACTGAAACAAGTTCTTTCTAATGGGAAAAGGGGGTCTTTGAATGTAGGGGCCGTTCTTATTTTACCTGAGGGATTCGAATTAGCCCCCCCCGATCGTATTTCTCCGGAAATGAAAGAAAAG…
>atpB_scaffold-blatX
ATGAGAATAAATCCTACTACTTCTGTTCCTGAGGTTTCCGCACTTGAAGAAAAAAACCTGGGGCGTATTGCTCAAATCATTGGTCCGGTACTGGATGTATCCTTTCCCCCAGGCAAGATGCCCAATATTTACAACGCTTTGGTAGTTAAGGGTCAAGATACAGTTGGCCAGCAAATTAATGTAACTTGCGAGGTACAGCAATTATTAGGAAATAATAGAGTTAGAGCTGTAGCTATGAGTGCTACAGATGGTCTGATGAGAGGAATGGAAGTGATTGACACAGGAGCTCCTCTAAGTGTTCCAGTCGGTGGAGCGACTCTCGGACGAATTTTCAACGTTCTTGGAGAGCCTGTTGATAATTTGGGTCCTGTAGATACTCGCACAACATCTCCTATTCAT…
>atpH_scaffold-blatX
ATGAATCCACTGATTTCTGCTGCTTCCGTTATTGCTGCTGGATTGGCTGTAGGGCTGGCTTCTATTGGACCTGGAGTTGGTCAAGGTACTGCTGCGGGCCAAGCTGTAGAAGGTATCGCAAGACAACCAGAAGCAGAGGGTAAAATACGAGGTACTTTATTGCTTAGTCTGGCTTTTATGGAAGCTTTAACAATTTATGGACTGGTCGTGGCATTAGCACTTTTATTTGCAAATCCCTTTGTTTAA
>psbF_scaffold-blatX
ATGACTATAGATCGAACCTATCCAATTTTTACAGTGCGATGGTTGGCTGTTCATGGACTAGCTGTACCTACCGTTTCTTTTTTGGGGTCAATATCAGCAATGCAGTTCATCCAACGATAA
>trnE-UUC_scaffold-blatN
GCCCCTATCGTCTAGTGGTTCAGGACATCTCTCTTTCAAGGAGGCAGCGGGGATTCAACTTCCCCTGGGGGTA
>trnC-GCA_scaffold-blatN
GGCGGCATGGCCGAGTGGTAAGGCGGGGGACTGCAAATCCTTTTTCCCCAGTTCAAATCCGGGTGTCGCCTGATCAAGAAA
>trnV-UAC_scaffold-blatN
AGGGCTATAGCTCAGTTAGGTAGAGCACCTCGTTTACACGCGCGCCAATGTTTTTCAGAGGAGTTCATCATGTAATCAACAGAATTTATCTTAGTAAAAATCGATGTCTTACTCCGTGGATTCGAAGGAACAAGAGAACAATAGCCTGACAACTGGTTGGTTGGTCCAATTGAGGTGCCAATTTGGGCGCCAAATCGAACCCATCATTGATTTGATAATTGATAAGGTGAATATCCAGTCCATTCAATGCTAGGCATAATGAGTATAAGGACCTCAAAAAAATCTCTTTTCGTCCTATGAACTTGAAGGTGTATGAAGTTTCATATTTGACGCTTTGGGCAGAGCAGAGCAGAGCGATAGAGACTCCATTTAACTTAACTTAGGTTGATCTAGGCCGAA…
>ycf3_scaffold-blatX
ATGCCTAGATCGCGGATAAATGGAAATTTTATTGATAAGACCTTTTCAATTGTAGCCAATATCTTATTACGAATAATTCCGACAACTTCAGGAGAAAAAGAGGCATTTACCTATTACAGAGATGGTGCGATTTGATCTTTTTTATTTCTTTATCGTTCTCAGTCTTACGAGAAAGGCACATGATTCGGGATAGAAAGAAAAAATATTATTGAAATAAACCTACGCTTGTTGAAGGTGAAGTTTGAAAATAGACCAATTCCTTCTGCCGTGTATCCTCGGTTGATGCAGCCTCAGACGCTTCAATTTTCAATTCTAGTCTTAAGCGAAAGGTTACACCTATTATGGGTTATGTATTACAGGGCAATCCCACTCCACTAGTACCAATAGGCGGCATAGGGG…
>cemA_scaffold-blatX
ATGGAAATATCAGATTGGATAGAATCGAGGAATGAAGTGGTTTCATTAACAATTCAAAGATTAAAAATGCCAAAAAAGAAAGCATTCAACCCCCTTCTATATCTTACATCTATAGTCTTTTTGCCCTGGTGGATTTCTCTCTCATTTAATAAAAGTATGGAATCTTTGGTTACTAATTGGTGGAATGCCGGGCAATCCGAAATTTTTTTGAATGAGATTCAAGAAAAGAACGTTCTAGAAAAATTCATAGAATTAGAAGAACTCTTCCTTTTGGACGAAATGATAAAGGAGTACCCGGATACACATATACAAAAGTTTCGTATAGGAATACACAAAGAAACGATACAATTGGTCAAGATGTACAATGAGGGTCATATCCATACCATTTTACACTTTTCG…
>ndhH_scaffold-blatX
ATGACTGTACCAACTACAAGAAAAGACCTTATGATAATCAATATGGGTCCTCACCACCCATCAATGCATGGTGTTCTTCGACTCATCGTTACTCTCGATGGGGAAGATGTTATTGACTGTGAACCCATATTGGGTTATTTACACAGAGGGATGGAAAAAATTGCTGAAAATCGAACAATTATACAATATCTTCCTTATGTAACACGCTGGGATTATTTAGCTACTATGTTTACGGAGGCAATAACGGTAAATGGACCAGAACAGTTGGGAAATATTCAAGTACCGAAAAGAGCGAGCTATATTAGAGTAATTATGCTAGAACTGAGTCGTATAGCTTCTCATTTGTTATGGCTTGGCCCTTTTATGGCAGATATCGGCGCGCAGACTCCTTTCTTCTAT…
>rpoC2_scaffold-blatX
ATGGCAGAACGGGCGGATCTAGTCTTTCACAATAAAGCGATAGATGGAACTGCCATGAAACGACTTATTAGTAGATTAATAGATCACTTTGGAATGGCATATACATCACATATCCTGGATCAAGTAAAGATTCTGGGTTTTCGGCAAGCCACTGCTACATCCATTTCATTAGGAATTGATGATCTTTTAACAATACCCTCTAAGGGATGGCTAGTACAAGATGCTGAACAACAAAGTTTAATTTTGGAAAAACACCACCATTATGGGAATGTACACGCGGTAGAAAAATTACGTCAATCCATTGAGATCTGGTATGCTACAAGCGAATATTTACGACAAGAAATGAATCCTAATTTTAGGATGACTGATCCTTCTAATCCAGTCCATATAATGTCTTTT…
>ndhD_scaffold-blatX
ATGTTAGCAATGTACAGCGGTCAAATAGGATCATTTTCTTCTCGGGATCTTTTACTTTTTTTTATCATGTGGGAATTAGAATTAATTCCTGTCTACCTACTTCTATCCATGTGGGGAGGGAAGAACCGTTTGTACTCAGCTACAAAATTTATTTTGTACACCGCAGGGGGTTCTATTTTTCTCTTAATGGGAGTTCTGGGTATGGGTTTATATGGTTCCAATGAACCAACATTAAATTTTGAAACATCAGCCAATCAATCATATCCTGTGGCATTGGAAATAATATTCTATTTTGGGTTTCTTATTGCTTATGCTGTAAAATTGCCGATTATACCTCTACATACATGGTTACCGGATACCCATGGAGAAGCACATTACAGTACATGTATGCTTTTAGCC…
>rrn5-I_scaffold-blatN
ATCCTGGCGTCGAGCTATTTTTCCGCAGGACCTCCCCTACAGTATCGTCACCGCAGTAGAGTTTAACCACCAAGTTCGGGATGGATTGGTGTGGTTCCTCTACGCCTAGGACACCAGAATA
>petD_scaffold-blatX
CAATAACAAAGAAACCTGACTTGAATGATCCTGTATTAAGAGCTAAATTGGCAAAAGGTATGGGTCATAATTATTACGGCGAACCTGCATGGCCCAATGATCTTTTATATATTTTTCCGGTAGTAATTCTAGGTACTATTGCATGTAACGTAGGTTTAGCGGTTCTAGAACCGTCAATGATTGGTGAACCGGCAGATCCATTTGCAACTCCTTTGGAAATATTACCCGAATGGTACTTCTTTCCCGTATTTCAAATACTTCGTACAGTACCAAATAAGTTATTGGGGGTTCTTTTAATGGTTTCAGTACCAGCAGGATTATTAACAGTCCCTTTTTTGGAAAATGTTAATAAATTCCAAAACCCCTTTCGTCGTCCAGTAGCTACAACTGTCTTTTTGA…
>psbJ_scaffold-blatX
ATGGCCGATACTACTGGAAGGATTCCTCTTTGGCTTATAGGCACTGTAGCTGGTATTCTTGTGATCGGTTTACTAGGTGTTTTCTTTTATGGTTCATATTCTGGGTTGGGTTCATCCCTGTAG
>rrn16-II_scaffold-blatN
TCTCATGGAGAGTTCGATCCTGGCTCAGGATGAACGCTGGCGGCATGCTTAACACATGCAAGTCGGACGGGAAGTGGTGTTTCCAGTGGCGGACGGGTGAGTAACGCGTAAGAACCTGCCCTTGGGAGGGGAACAACAGCTGGAAACGGCTGCTAATACCCCGTAGGCTGAGGAGCAAAAGGAGGAATCCGCCCGAGGAGGGGCTCGCGTCTGATTAGCTAGTTGGTGAGGCAATAGCTTACCAAGGCGATGATCAGTAGCTGGTCCGAGAGGATGATCAGCCACACTGGGACTGAGACACGGCCCAGACTCCTACGGGAGGCAGCAGTGGGGAATTTTCCGCAATGGGCGCAAGCCTGACGGAGCAATGCCGCGTGGAGGTAGAAGGCCTGCGGGTCG…
>trnY-GUA_scaffold-blatN
GGGTCGATGCCCGAGTGGTTAATGGGGACGGACTGTAAATTCGTTGGCAATATGTCTACGCTGGTTCAAATCCAGCTCGGCCCA
>psbT_scaffold-blatX
ATGGAAGCATTGGTTTATACGTTCCTTTTAGTCTCGACTCTAGGAATCATTTTTTTCGCGATATTTTTTCGAGAGCCACCTAAGGTTCCGACTAAAAAGGCGAAATGA
>rps11_scaffold-blatX
ATGACAAAAACCATACCAAGAATTGGCTCACGTAGGAATGGACGTATTGGCTCACGTAAGAATGGACGTCGAATACCAAAAGGAGTTATTCATGTTCAAGCAAGTTTTAACAATACCATTGTAACGGTTACAGATATACGAGGTCGGGTAGTTTCTTGGTCCTCAGCCGGTACTTGTGGCTTCAGGGGCACAAGAAGAGGGACGCCATTTGCGGCTCAAACCGCCGCCGCAAATGCTATTCGTACAGTAGTAGATCAGGGTATGCAACGAGCAGAAGTCATGATAAAAGGTCCCGGTCTTGGAAGAGATGCAGCATTACGAGCTATTCGTAGAAGTGGTATACTATTAAGTTTTGTCAGAGACGTAACCCCTATGCCACATAATGGATGTAGGCCTCCT…
>rpl33_scaffold-blatX
ATGGCCAAGGGTAAAGATGTGAGAGTAAGAGTTATTTTGGAATGTAACAGTTGTGTCCGAAACGATATTAATAAGAAATCACGGGGTATTTCCAGATATATTACTCAAAAGAATCGACACAATACGCCTAGTCGATTGGAATTGAGAAAATTTTGTCCCTATTGTTACAAGCATACGATTCATGGGGAGATAAAGAAATAG
>psbD_scaffold-blatX
ATGACTATAGCCCTTGGTAGATTTACCAAAGACGAAAAGGATTTATTTGATACTATGGATGACTGGTTACGGAGGGACCGTTTCGTTTTTGTAGGTTGGTCCGGTCTATTGCTCTTTCCTTGTGCCTATTTTGCTTTAGGGGGTTGGTTCACAGGTACAACCTTTGTAACTTCGTGGTATACCCATGGATTGGCCAGTTCCTATTTGGAAGGATGCAATTTCTTAACCGCCGCAGTTTCTACTCCTGCTAATAGTTTAGCGCATTCTTTGTTGCTACTATGGGGTCCTGAAGCACAAGGAGACTTGACTCGTTGGTGTCAATTAGGCGGCCTATGGACTTTTGTTGCTCTCCATGGCGCTTTCGGACTAATAGGTTTCATGTTACGTCAATTCGAACTT…
>rpl23_scaffold-blatX
ATGGATGGAATCAAATATGCAGTATTTACAGACAAAAGTATTCGGTTATTGGGGAACAATCAATATACTTCTAATGTCGAATCAGGATCAACTAGGACAGAAATAAAGCATTGGGTCGAACTCTTCTTTGGTGTCAAGGTAATAGCTATGAATAGTCATCGACTCCCGGGAAAGGGTAGAAGAATGGGACCCATTATGGGACATACAATGCATTACAGACGTATGATCATTACGCTTCAACCGGGTTATTCTATTCCACCTCTTAGAAAGAAAAGAACTTAA
>trnS-GGA_scaffold-blatN
GGAGAGATGGCCGAGTGGTTCAAGGCGTAGCATTGGAACTGCTATGTAGGCTTTTGTTTACCGAGGGTTCGAATCCCTCTCTTTCCG
>psbL_scaffold-blatX
ATGACACAATCAAACCCGAACGAACAAAGTGTTGAGTTGAATCGTACCAGTCTTTACTGGGGGTTATTACTCATTTTTGTACTTGCTGTTTTATTTTCCAATTATTTCTTTAATTAA
>rpl2_scaffold-blatX
ACGGCGATACATTTATACAAAACTTCTACCCCGAGCACACGCAATGGAGCCGTCGGCAGTCAAGTGAAATCCAATCCACGAAATAATTTGATCCATGGACAGCGTCGTTGTGGTAAAGGTCGTAATGCCAGAGGAATCATTACCGCAAGGCATAGAGGGGGAGGTCATAAGCGTCTATACCGTAAAATCGATTTTAGACGGAATGAAAAAGACATATCTGGTAGAATCGTAACCATAGAATACGACCCTAATCGAAATGCATATATTTGTCTCATACACTATGGGGATGGTGAGAAGAGATATATTTTACATCCCAGAGGGGCTATAATTGGAGATACCATTGTTTCTGGTACAGAAGTTCCTATCTCAATGGGAAATGCCCTACCTTTGAGTGCGGTT…
>rpoA_scaffold-blatX
ATGCTTCGAGAGGAAGTAACAGTATCTACTAGGACACTACAGTGGAAGTGTGTTGAATCAAGAGCAGACAGTAAGCGTCTTTATTATGGACGTTTTCTTTTGTCTCCGCTTATGAAAGGCCAAGCCGATACAATAGGCATCGCGATGCGAAGGGCTTTGCTTGGAGAAATAGAAGGAACATGTATCACACGCGCCAAATCTGAAAAGATACCACACGAATATTCTACCATAGTAGGGATTGAAGAATCAGTACATGAAATTTTAATGAATTTGAAAGAAATTGTATTGAGAAGTAATCTATACGGAACTCGCGACGCATATATTTGTGTCAAGGGTCCTGGATATGTAACTGCTCAAGACATCATCTCACCACCTTCTGTGGAAATAGTTGATACTACA…
>ndhI_scaffold-blatX
ATGTTCCCCATGGTAACTGGGTTCATGAATTATGGCCAACAAACAGTACGGGCTGCAAGGTATATCGGTCAAAGTTTTATGATTACCTTATCCCATGCAAATCGTTTACCTGTAACTATTCAATATCCTTATGAAAAATTGATCACCTCGGAACGTTTCCGTGGTCGAATCCACTTTGAATTTGATAAATGCATTGCTTGTGAAGTATGTGTTCGGGTATGTCCTATAGATCTACCCGTTGTTGATTGGAAATTGGAAACTTCTATTCGAAAGAAACGATTGCTTAATTACAGTATTGATTTCGGAATCTGTATATTTTGTGGTAACTGTGTTGAGTATTGTCCAACGAATTGTTTATCAATGACTGAAGAATATGAACTTTCTACTTATGATCGTCAC…
>trnL-UAG_scaffold-blatN
GCCGCTATGGTGAAATCGGTAGACACGCTGCTCTTAGGAAGCAGTGCTAAAGCATCTCGGTTCGAGTCCGAGTGGCGGCA
>rrn23-I_scaffold-blatN
AGGAGAGCACTCATCTTGGGGTGGGCTTACTACTTAGATGCTTTCAGCAGTTATCCGCTCCGCACTTGGCTACCCAGCGTTTACCGTGGGCACGATAACTGGTACACCAGAGGTGCGTCCTTCCCGGTCCTCTCGTACTAGGGAAAGGTCCTCTCAATGCTCTAACGCCCACACCGGATATGGACCGAACTGTCTCACGACGTTCTGAACCCAGCTCACGTACCGCTTTAATGGGCGAACAGCCCAACCCTTGGAACATACTACAGCCCCAGGTGGCGAAGAGCCGACATCGAGGTGCCAAACCTTCCCGTCGATGTGAACTCTTGGGGAAGATCAGCCTGTTATCCCTAGAGTAACTTTTATCCGTTGAGCGACGGCCCTTCCACTCGGCACCGTCGG…
>psbC_scaffold-blatX
GTGGAAACGCTCTTTAATGGAACTTTAGCTTTAGCTGGTCGTGACCAAGAAACCACCGGTTTCGCTTGGTGGGCCGGGAACGCCCGACTTATCAATTTGTCCGGTAAACTACTCGGAGCTCACGTAGCCCATGCGGGATTAATCGTATTCTGGGCAGGAGCAATGAATCTATTTGAAGTGGCCCATTTCGTACCAGAGAAGCCCATGTATGAACAAGGATTGATTTTACTTCCCCACCTGGCTACTCTAGGTTGGGGGATAGGCCCTGGTGGGGAAGTTATAGACACCTTTCCATACTTTGTATCTGGAGTACTTCACTTAATTTCCTCTGCAGTATTGGGCTTTGGAGGTATTTATCATTCACTTCTCGGACCCGAAACTCTTGAAGAATCTTTTCCA…
>rpl36_scaffold-blatX
ATGAAAATAAGGGCCTCCGTTCGTAAAATTTGTGAAAAATGTCGACTGATTCGTAGGCGTGGACGAATTATAGTAATTTGTTCCAATCCAAGGCATAAACAGAGACAGGGATAA
>rbcL_scaffold-blatX
ATGTCACCACAAACAGAGACTAAAGCAAGTGTTGGCTTCAAAGCAGGTGTTAAAGATTACAAATTGACTTATTATACTCCGGAATATGCACCCAAAGATACTGATACCTTGGCGGCATTCCGAGTAACTCCTCAACCTGGAGTTCCACCCGAAGAAGCAGGGGCTGCTGTAGCTGCCGAATCTTCTACAGGTACATGGACAACTGTGTGGACCGACGGACTTACCAGCCTTGATCGTTACAAAGGACGATGCTACCACATTGAGCCTGTTGCTGGAGAAGAAAATCAATATATTTGTTATGTAGCATATCCCTTAGACCTTTTTGAAGAAGGTTCTGTTACTAACATGTTTACTTCCATTGTGGGTAATGTATTTGGGTTTAAAGCGCTACGCGCTCTA…
>psbZ_scaffold-blatX
ATGACTATTGCTTTTCAATTGGCTGTTTTTGCATTAATTGCTACTTCATCAATCTTATTGATTAGTGTACCCGTTGTATTTGCTTCTTCTGACGGTTGGTCAAGTAACAAAAATGTTGTATTTTCCGGTACATCATTATGGATTGGATTAGTCTTTCTAGTAGCTATCCTTAATTCTCTCATCTCTTGA
>trnF-GAA_scaffold-blatN
GTCGGGATAGCTCAGTTGGTAGAGCAGAGGACTGAAAATCCTCGTGTCACCAGTTCAAATCTGGTTCCTGGCA
>trnS-GCU_scaffold-blatN
GGAGAGATGGCTGAGTGGACTAAAGCGTCGGATTGCTAATCCGTTGTACGAGTTATTCGTACCGAGGGTTCGAATCCCTCTCTTTCCG
>ndhF_scaffold-blatX
ATGGAACATACATATCAATATGCGTGGATCATACCTTTCGTTCCCCTTCCAGTTCCTATAGCAATAGGGTTAGGGCTTCTCCTTGTTCCGGCGGCAACAAAAAATATTCGTCGTATATGGGCTTTTTCTAGTGTTTTATTACTAAGTATCGTTATGATTTTTTCAGCCGATCTGTCTATTCAACAAATAAATGGCAGTCCTATCTACCAATATGTATGGTCTTGGACCATCAATAATGATTTTTCCTTAGATTTCGGCCATTTGATAGATCCGCTTACTTCCATTATGTTAATATTAATTACTACTGTTGGAATAATGGTTCTTATTTATAGTGATAATTATATGTCTCATGATCAAGGCTATTTGAGATTTTTTGCTTATATGAGTTTTTCTAATGCT…
>rps12_scaffold-blatX
ACTATCACCCCCAAAAAACCAAACTCTGCCTTACGTAAAGTTGCCAGAGTACGATTAACCTCTGGATTTGAAATCACTGCTTATATACCTGGTATTGGCCATAATTCACAAGAACATTCTGTAGTCTTAGTAAGAGGAGGAAGGGTTAAGGATTTACCCGGTGTGAGATATCACATTGTTCGAGGAACCCTAGATGCTGTCGGAGTAAAAGATCGTCAACAAGGGCGTTCTAGTGCGTTGTAGATTCTTATCCAAGACTTGTATCATTTGATGATGCCATGTGAATCGCTAGAAACATGTGAAGTATATAGCTAACCCAATAACGAAAGTTTCGTAAGGGGACTGGAGCAGGCTACCATGAGACAAAAGATCTTCTTTCTAAAGAGATTCGATTCGGAA…
>psbH_scaffold-blatX
ATGGCTACACAAACCGTTGAGGGTAGTTCTAGATCTGGTCCAAGACGAACTACTGTAGGGAATTTATTGAAACCATTGAATTCGGAATATGGTAAAGTAGCTCCCGGGTGGGGAACTACCCCTTTGATGGGGGTCGCAATGGCTCTATTTGCAGTATTCCTATCTATTATTTTGGAGATTTATAATTCTTCCGTTTTACTGGATGGAATTTCAATGAATTAG
>trnP-GGG_scaffold-blatN
GGGATGTAGCGCAGCTTGGTAGCGCGTTTGTTTTGGGTACAAAATGTCACGGGTTCAAATCCTGTCATCCC
>ndhE_scaffold-blatX
ATGATGCTCGAACATGTACTTGGTTTGGGTGCCTTTTTATTATCCACCGGTATTTATGGATTGATTACAAGTCGAAATATGGTTCGAGCGCTTATGTGTCTTGAGCTTATACTGAATGCAGTTAATATAAATTTAGTAACATTTTCTGATTTATTTGATAATCGCCAATTAAAAGGAGACATTTTCGCCATTTTTGTTATAGCAATTGCAGCTGCTGAAGCAGCTATTGGATTAGCTATTGTTTCGTCAATTCATCGTAACAGAAAATCAACTCGTATCAATCAATCGAATTTGTTGAATAAATAA
>trnM-CAU_scaffold-blatN
ACCTACTTAACCCAGTGGTTAGAGTATTGCTTTCATACGGCAGGAGTCATTGGTTCAAATCCAATAGTAGGTA
>rps7_scaffold-blatX
ATGTCACGTCGAGGTACTGCAGAAGAAAAAACTGCAAAATCCGATCCAATTTATCGTAATCGATTAGTTAACATGTTGGTTAACCGTATTTTGAAACACGGAAAAAAATCATTGGCTTATCAAATTCTCTATCGAGCCCTGAAAAAGATTCAACAAAAGACAGAAACAAATCCACTATCTGTTTTACGTCAAGCAATACGTGGAGTAACTCCCGATATAGCAGTAAAAGCAAGACGTGTAGGCGGATCGACTCATCAAGTTCCCATTGAAATAGGATCTACACAAGGAAAAGCACTTGCCATTCGTTGGTTATTAGGGGCATCCCGAAAACGTCCGGGTCGAAATATGGCTTTCAAATTAAGTTCCGAATTAGTGGATGCTGCCAAAGGGAGTGGCGAT…
>psbA_scaffold-blatX
ATGACTGCAATTTTAGAGAGACGCGAAAGCCAAAGCCTATGGGGCCGCTTCTGTAACTGGGTAACCAGCACCGAAAACCGTCTTTACATTGGATGGTTCGGTGTTTTGATGATCCCTACTTTATTGACCGCAACTTCTGTATTTATTATTGCCTTCATTGCTGCTCCTCCAGTAGATATTGATGGTATTCGTGAACCCGTTTCTGGGTCTCTACTTTATGGAAACAATATCATTTCTGGTGCTATTATTCCTACTTCTGCAGCTATAGGGTTGCACTTTTACCCGATATGGGAGGCAGCATCTGTTGATGAATGGTTATACAATGGTGGTCCTTATGAACTAATTGTTCTACACTTCTTACTTGGTGTAGCTTGTTACATGGGTCGTGAGTGGGAACTT…
>ndhB_scaffold-blatX
ATGATCTGGCATGTACAGAATGAAAACTTCATTCTCGATTCTACGAGAATTTTTATGAAAGCGTTTCATTTGCTTCTCTTCCATGGAAGTTTTATTTTCCCAGAATGTATCCTAATTTTTGGCCTAATTCTTCTTCTGATGATCGATTCAACCTCTGATCAAAAAGATATACCTTGGTTATATTTCATCTCTTCAACAAGTTTAGTAATGAGCATAGCGGCCCTATTGTTCCGATGGAGAGAAGAACCTATGATTAGCTTTTCGGGAAATTTCCAAACGAACAATTTCAACGAAATCTTTCAATTTCTTATTTTACTATGTTCAACTCTATGTATTCCTCTATCCGTAGAGTACATTGAATGTACAGAAATGGCTATAACAGAGTTTCTGTTATTCGTA…
>atpF_scaffold-blatX
ATGAAAAATGTAACCGATTCTTTCGTTTCCTTGGGTCACTGGCCATCCGCCGGGAGTTTCGGGTTTAATACCGATATTTTAGCAACAAATCCAATAAATCTAAGTGTAGTCCTTGGTGTATTGATTTTTTTTGGAAAGGGAGTGTGTGCGAGTTGTTTATTTCAAGAATAAGCTGGATCTAACCAGCTGCACTTTATTCTTTATAATTAGGAAAGAAAGGTGTACGATCTCGCGAATTACTTCTGAATAAATTAAGAAATCATATGTACGAACCATAGCATTTCGTGATTCATTGGTAAATAAACTTTGATTCTCTATCAACCAATAATATGGGACCCTAAACAAAACATGGTTAAAGCTAAATTGTTTGAAGTTCGGGCGCAACATTGGTGCTCTTTC…
>trnK-UUU_scaffold-blatN
GGGTTGCTAACTCAACGGTAGAGTACTCGGCTTTTAAGTGCGGCTAGAATCTTTTACACATTTCGATGAAGCAACGGATTCGTCCATACCATTGGTAGAGTTTGTAAGACCACGACTGATCCTGAGAGGGACTGAATGGAAAAAACAGCATGTCGTATAAATGAATAACTCTAAGATAAGAGTACTTAATCCTTGCGGGATCGGTACAAAATATTGTTTGTATTCTTAGAGTTTTAATTCGTAGAGCGGTACAAAAAAATCAATTCATGCTTGGATCGAGTGAATAAATGGATAGAGCCGAAAAGCTCAAATTATAGGGAAACAAAAAAAGCAACGAGCTTCTGTTTTTAATTCGAATAATTACCCGATCTAATTATACGTTAGAAATATATTAGTCCC…
>trnA-UGC_scaffold-blatN
GGGGATATAGCTCAGTTGGTAGAGCTCCGCTCTTGCAATTGGGTCGTTGCGATTACGGGTTGGATGTCTAATTGTCCAGGCGGTAATGATAGTATCTTGTACCTGAACCGGTGGCTCACTTTTTCTAAGTAATGGGAAAGAGGACCGAAACATGCCACTGAAAGACTCTACTGAGACAAAGATGGGCTGTCAAGAACGTAGAGGAGGTAGGATGGGCAGTTGGTCAGATCTAGTATGGATCGTACATGGACGGTAGTTGGAGTCGGCGGCTCTCCTAGGGTTCCCTCATCTGGGATCCCTGGGGAAGAGGATCAAGTTGGCCCTTGCGAACAGCTTGATGCACTATCTCCCTTCAACCCTTTGAGCGAAATGCGGCAAAAGGAAGGAAAATCCATGGGC…
>rrn23-II_scaffold-blatN
TTCAAACGAGGAAAGGCTTACGGTGGATACCTAGGCACCCAGAGACGAGGAAGGGCGTAGCAAGCGACGAAATGCTTCGGGGAGTTGAAAATAAGCATAGATCCGGAGATTCCCGAATAGGTCAACCTTTCGAACTGCTGCTGAATCCATGGGCAGGCAAGAGACAACCTGGCGAACTGAAACATCTTAGTAGCCAGAGGAAAAGAAAGCAAAAGCGATTCCCGTAGTAGCGGCGAGCGAAATGGGAGCAGCCTAAACCGTGAAAACGGGGTTGTGGGAGAGCAATACAAGCGTCGTGCTGCTAGGCGAAGCGGTCGAGTGCTGCACCCTAGATGGCGAGAGTCCAGTAGCCGAAAGCATCACTAGCTTATGCTCTGACCCGAGTAGCATGGGGCACGT…
>rpl16_scaffold-blatX
TAACCCCAAAAGAACCAGATTTCGTAAACAACATAGAGGAAGAATGAAGGGAATATCTTATCGAGGCAATCGAATTTGTTTCGGGGGATACGCCCTTCAGGCACTTGAACCTGCTTGGATCACATCTAGACAAATAGAAGCGGGGCGACGAGCCATGACAAGATATGCACGTCGCGGTGGAAAAGTATGGGTACGTATATTTCCAGACAAACCTGTTACAGTAAGGCCTACCGAAACACGTATGGGTTCGGGGAAAGGATCTCCCGAATATTGGGTATCTGTCGTTAAACCGGGTCGAATACTTTATGAAATGGGTGGAGTATCAGAAATTGTAGCCAGAGAAGCTATTTCTATAGCTGCGTCCAAAATGCCTATACGAACTCAATTCATTATTGCGGA…
>trnQ-UUG_scaffold-blatN
TGGGGCGTGGCCAAGTGGTAAGGCAACGGGTTTTGGTCCCGCGACTCGGAGGTTCGAATCCTTCCGTCCCAG
>trnN-GUU_scaffold-blatN
TCCTCAGTAGCTCAGTGGTAGAGCGGTCGGCTGTTAACTGATTGGTCGTAGGTTCGAATCCTACTTGGGGAG
>rrn4.5-I_scaffold-blatN
GTTCAAGTCTATTGGTCTGTTAGGATGCCTCAGCTGCATACATCACTGCACTTCCACTTGACACCTATCGTAATGATAAACGGCTCGTCTCGCCGTGACCTTC
>rps19_scaffold-blatX
ATGGCACGTTCACTAAAAAAAAATCCTTTTGTAGCTAATCATTTATTGGGAAAAATTGCGAAACTCAACATGAGGGCAGAAAAAGATACAATTGTAACTTGGTCCCGGGCATCTACCATTATACCCACAATGATCGGCCATACAATTGCTATTCATAATGGAAAGGAGCATTTGCCTGTTTATATAACAGATCGTATGGTAGGTCACAAACTGGGAGAATTTGCACCTACTCTGAATTTCCGGGGACATGCGAGAAACGATAATAAATCTCGTCGTTAA
>atpE_scaffold-blatX
ATGACCTTAAATCTATGTGTACTGACTCCTAATCGAATTGTTTGGAATTCAGAAGTGAAAGAAATTATTTTATCGACTAATAGTGGCCAAATTGGTGTATTACCAAATCACGCACCTATTGCCACGGCTGTAGATATAGGCATTTTGAGAATACGTCTTAACGACCAATGGTTAACAATAGCTCTGATGGGCGGTTTCGCTAGAATAGGCAATAATGAAATAACTATTTTAGTAAATGATGCAGAAAGGGGTAGTGACATTGATCCGCAAGAAGCTCAACAAACTCTTGAAATAACTGAAGCTAACTTGAGGAGCGCTGAAGGCAAGAGACAAACAATTGAGGCAAATTTAGCTCTCAGACGAGCTAGGACGCGAGTAGAGGCTATCAATGCGATTTCA…
>ycf1-fragment_scaffold-blatX
ATGATTTTGAAATATTTTCTACTAGGTAATCTATTATCCTTATGCATGAAGATAATCAATTCGGTCGTTGTGGTCGGACTCTATTATGGATTTCTGACCACATTCTCCATAGGGCCCTCTTATCTCTTCCTTCTCCGAGCTCGGGTTATGAAAGAAGGAACCGAGAAGGAGGTATCAGCAACAACTGGTTTTATTGCGGGACAGCTCATGATGTTCATATCGATCTATTATGCGCCTCTGCATCTAGCATTGGGTAGACCTCATACAATAACTGTCCTAGTTCTACCGTATCTTTTGTTTCATTTCTTCTGGAACAATCACAAACACTTTTTTGATTATGGATCTACTACCAGAAATTCAATGCGTAATCTCAGCATTCAGTGTGTATTCTTGAATAAT…
>rps14_scaffold-blatX
ATGGCAAGGAAAAGTTTGATTCAGAGGGAGAAGAAGAGGCAGAGATTAGAACAGAAATATCATTTGATTCGTCGATCCTCAAAAAAGGAAATCAAAAAAGTTCCGTCGTTGAGTGACAAATGGGAAATTCATGGAAAATTACAATCCTCACCGCGTAATAGTGCACCTACACGTCTTCATCGACGTTGTTTTTCGACCGGAAGACCGAGAGCTAACTATCGAGACTTTGGGTTATCTGGACACATACTTCGTGAAATGGTTCATGCATGTTTGTTACCAGGTGCAACAAGATCAAGTTGGTAAGGATCAAACTATCCCTTCATGTTTCTATTGA
>psbB_scaffold-blatX
ATGGGTTTACCTTGGTATCGTGTTCATACCGTCGTATTGAATGATCCCGGTCGCTTGCTTTCTGTACATATAATGCATACAGCTCTCGTTTCTGGTTGGGCCGGTTCAATGGCTTTGTACGAATTAGCAGTTTTTGATCCCTCCGACCCTGTTCTTGATCCAATGTGGAGACAAGGTATGTTCGTTATACCTTTCATGACTCGTTTAGGAATAATCAATTCATGGAGCGGTTGGAGTATCACAGGGGGGACTATAACGAATCCGGGTATTTGGAGTTACGAAGGTGTGGCTGGGGCACATATTATGTTTTCTGGTTTGTGCTTCTTGGCAGCTATCTGGCATTGGGTATATTGGGATCTAGAAATATTCTGTGATGAACGTACAGGAAAACCTTCTTTG…
>trnD-GUC_scaffold-blatN
GGGATTGTAGTTCAATCGGTCAGAGCACCGCCCTGTCAAGGCGGAAGCTGCGGGTTCGAGCCCCGTCAGTCCCG
>trnT-GGU_scaffold-blatN
GCCCTTTTAACTCAGCGGTAGAGTAACGCCATGGTAAGGCGTAAGTCATCGGTTCAAATCCGATAAGGGGCT
>rps2_scaffold-blatX
ATGACAAGAAGGTATTGGAACATAAATTTGGAAGAGATGATGGAAGCAGGAGTTCATTTTGGTCATGGTACTAGGAAGTGGAATCCTAGAATGGCACCTTACATCTCTGCAAAGCGTAAAGGTATTCATATTACAAATCTTACTAGAACTGCTCGTTTTTTATCAGAAGCTTGTGATTTGGTTTTTGATGCAGCAAGTAGGGGAAAACAATTCTTAATCGTTGGTACAAAAAATAAAGCAGCTGATTCAGTAGCATCGGCTGCAATAAGGGCTCGATGTCATTATGTTAATAAAAAATGGCTCGGTGGTATGTCAACGAATTGGTCCACTACAGAAACAAGACTTCATAAGTTCAGGGACTTGAGAGCGGAACAAAAGACGGGAAGACTCAACCGTCTT…
>ycf2_scaffold-blatX
GTGAAACGACATCCGTTAAAATCCTGGATCCTCGAATTGAGAGAGATATTGAGAGAGATCAAGAATTCTCACAATTTAGTAGATTCGTGGACCAAATTCGATTCCGTGGGATCTTTCACTCACATTTTTTTCCACCAAGAACGTTTTATGAAACTCTTTGACTCCCAAATTTGGAGTATCCTACTTTCGCGCGATTCACAGGGTTCAACAAGCAATCGATATTTCACGATCAAAGGTGTAGTACTGCTTGCAGTAGCGGTCCTTATATATCGTATTAACAATCGAAATATGGTCGAAAGAAAAAATCTCTATTTGATGGGGCTTCTTCCTATACCTATGAATTCCATTGGACCCAGAAATGAGACATTGGAAGAATCTTTTGGGTTTTCCAATATCAAT…
>psaJ_scaffold-blatX
ATGCGAGATCTAAAAACATATCTTTCTGTGGCACCCGTGTTAAGCACTCTATGGTTCGGGTCTTTAGCAGGTCTATTGATAGAGATCAATCGTTTATTCCCAGATGCGTTGACATTCCCTTTTTTTTCATTCTAG
>rrn4.5-II_scaffold-blatN
GAAGGTCACGGCGAGACGAGCCGTTTATCATTACGATAGGTGTCAAGTGGAAGTGCAGTGATGTATGCAGCTGAGGCATCCTAACAGACCAATAGACTTGAAC
>rps4_scaffold-blatX
ATGTCTCGTTACCGAGGGCCTCGTTTCAAAAAAATACGCCGGCTGGGTGTTTTACCGGGACTAACTAGCAAAAGACCGACACCCGGAAGTGATCTTAGAAATCAATCGCGCTTCGGAAAAAGATCTCAATATCGTATTCGTTTAGAAGAAAAACAAAAATTGCGTTTTCATTATGGTTTGACAGAGAGACAATTACTTAAATACGTTCATATCGCTGGAAAAGCCAAGGGGTCAACAGGCCAGGTTTTACTACAATTACTTGAAATGCGTTTGGATAACATCCTTTTTCGATTAGGTATGGCTTCGACCATTCCTGGAGCCCGACAATTAGTTAACCATAGGCATATTTTGGTTAATGGTCGTATAGTAGATATACCAAGTTATCGATGCAAAGCCCGA…
>rpoB_scaffold-blatX
ATGAAGAATGAGCCTTGGGAAATGAATGGGATTTTTTCGATAAATGGGAAACTCAAAATGCTCCGGGATGGAAATGAGGGAATGTCTACAATACCTGGGTTTAGTCAGATACAATTTGAGGGGTTTTGTCGATTCATTGATCAGGGATTGACGGAAGAACTTTATAAGTTTCCAAAAATTGAAGATACAGATCAAGAAATTGAATTTCAATTATTTGTAGAAACATATCAATTAGTGGAACCCCTGATAAAAGAAAAAGATGCTGTGTATGAATCACTCACATATTCTTCTGAATTATATGTGCCCGCGGGATTAATTTGGAAAACTGTTAGGGATACGCAAGAACAAACCATATTTATTGGAAAAATTCCTCTAATGAATTCCCTGGGAACTTCTATA…
>trnP-UGG_scaffold-blatN
AGGGATGTAGCGCAGCTTGGTAGCGCGTTTGTTTTGGGTACAAAATGTCACGGGTTCAAATCCTGTCATCCCTA
>rpoC1_scaffold-blatX
ATGATCGACCGATATAAACATCACCAACTTCGAATTGGATTAGTTTCTCCTCAACAAATAATTTCTTGGGCCAATAAAATTTTACCTAATGGAGAGATGGTTGGAGAGGTGACAAAACCTTATACTTTTCATTACAAAACCAATAAACCGGAAAAAGATGGGTTGTTTTGTGAAAGAATTTTTGGGCCCATAAAAAGTGGAATTTGTGCTTGTGGAAATTATCGAGTAATCGGAGATGAAAAAGAAGACCCGAAATTTTGTGAACAATGTGGAGTCGAATTTGTTGATTCTCGGGTACGAAGATATCAAATGGGATACATCAAACTCGCGTGTCCAGTAACTCATGTGTGGTATTTGAAGCGTCTTCCTAGTTATATCGCGAATCTTTTAGATAAACCT…
>ndhC_scaffold-blatX
ATGTTTCTGCTTCACGAATATGATATTTTCTGGGCATTTCTAATAATATCAAGTGTTATTCCTATTTTGGCATTTATAATTTCCGGAGTTTTGGCCCCAATTAACGAAGGACCAGAGAAACTTTCTAGTTATGAATCGGGTATAGAACCAATGGGCGATGCTTGGTTACAATTCCGAATCCGTTATTATATGTTTGCGCTAGTTTTTGTTGTTTTTGATGTTGAAACGGTTTTTCTTTATCCATGGGCGATGAGTTTCGATGTATTGGGTGTATCTGTATTTATAGAAGCTTTAATTTTCGTGCTTATCCTAATTGTTGGTTTAGTTTATGCATGGCGAAAAGGAGCATTGGAATGGTCTTAG
>psbM_scaffold-blatX
ATGGAAGTAAATATTCTAGCATTTATTGCTACTGCACTGTTCATTCTAGTTCCTACTGCTTTTTTACTTATCATTTACGTAAAAACGGTCAGTCAAAATGATTAA
>atpA_scaffold-blatX
ATGGCAACCCTTCGAGCCGACGAAATTAGTAATATTATCCGTGAACGTATTGAGCAATATAATAGAGAAGTCAAGATTGTGAATACTGGCACCGTACTTCAAGTAGGCGATGGCATTGCTCGTATTCATGGTCTTGATGAAGTAATGGCAGGTGAATTAGTAGAATTCGAAGAGGGTACAATAGGCATTGCTCTTAATTTGGAATCCAATAATGTTGGTGTTGTGTTAATGGGTGACGGTTTGATGATACAAGAGGGAAGTTCTGTAAAAGCAACAGGAAGAATTGCTCAGATACCAGTGAGCGAGGCTTATTTGGGTCGTGTTATAAATGCTCTGGCTAAACCTATTGATGGGAGAGGTGAGATTTCAGCCTCGGAATCTCGGTTAATTGAATCCCCC…
>rps12-fragment_scaffold-blatX
ATGCCAACCATTAAACAACTTATTAGAAACACAAGACAGCCAATAAAAAATGTAACAAAATCCCCCGCTCTTCGGGGATGTCCTCAGCGTCGAGGAACATGTACTAGGGTGTAT
>trnR-UCU_scaffold-blatN
GCGTCCATTGTCTAATGGATAGGACAGAGGTCTTCTAAACCTTTTGTATAGGTTCAAATCCTATTGGACGCA
>petB_scaffold-blatX
ATGACTTTTTACTATCGCCCGACCGTTACCGAGGCCTTTGCCTCTGTTCAATACATAATGACTGAAGCCAACTTTGGTTGGTTAATCCGATCAGTTCATCGATGGTCGGCAAGTATGATGGTCCTAATGATGATCTTGCACGTATTTCGTGTGTATCTCACCGGTGGATTTAAAAAACCTCGCGAATTAACTTGGGTTACAGGTGTGGTTCTGGCTGTATTGACCGCATCTTTTGGTGTAACTGGTTATTCCTTGCCTTGGGACCAAATCGGTTATTGGGCGGTCAAAATTGTGACAGGCGTACCTGACGCTATTCCTGTAATAGGATCACCCTTAGTCGAGTTATTACGTGGAAGTGCTAGTGTGGGTCAATCAACTTTGACTCGTTTTTATAGTTTA…
>trnL-UAA_scaffold-blatN
GGGGATATGGCGAAATTGGTAGACGCTACGGACTTGATTGGATTGAGCCTTAGTATGGAAACATACTAAGTGATAACTTTCAAATTCAGAGAAACCCTGGAATTAAAAATGGGCAATCCTGAGCCAAATCCTGTTTTTAGAAAACAAATCAAAATCAAATAAAGGGTTCAGAAAGCAAGAATAAAAAAGGATAGGTGCAGAGACTCAATGGAAGCTATTCTAACGAATAGAGTTGACTGCGTTGATCGAGGAATCCTTCTATTTAAACTCCAGAAAGGATGAACCCATATACGTATATATACGCAATAAAATATCAAATATTAATATATGTTATATGCAAAATAATTCTTGTGAATCGATTCTAAGTTTAAGGAAGAATCGAATATTCACTGATCAAAT…
>psaI_scaffold-blatX
ATGACAACTTTCAACTTACCCTCTTTTTTTGTGCCTTTAGTGGGTCTATTATTTCCGGCAATTGCAATGGCTTCTCTATCTTTTTATGTTCAAAAAAACAAGATTGTCTAG
>trnS-UGA_scaffold-blatN
GGAGAGATGGCTGAGTGGTTGATAGCTCCGGTCTTGAAAACCGGTATAGTTCTTTGTTCAGAACTATCGAGGGTTCGAATCCCTCTCTCTCCT
>ccsA_scaffold-blatX
ATGATATTTTTGACTTTAGAACATATATTAACTCACATTTCTTTATCGATTGTTTCCATTGTAATTACGATTTATTTGATGAACTTATTAATCTACGAAATCGTAGAACTATATGATTCGTCGGAAAAAGGAATGGTAGCTACTTTTGTTTGTATAACAGGATTATTAGTTATTCGTTGGATTTATTCGGGACATTTACCCTTAAGTGATTTATATGAATCATTAATGTTCCTTTCATGGAGTTTCTCAATTATTCATATGGTTTCCCATTTTAAGAACCATATGAATCATTTAAATGCAATAACTGCACCAAGTGTTGTTTTTACTCAAGGATTTGCTACTTCAGGTCTTTTAACTAAAATGCATCAATCCACAATATTAGTGCCTGCTCTACAATCA…
>ndhA_scaffold-blatX
ATGATAATTGATACGACAAGAATACAAGCTATCAATTCTTTTTCCAGATCGGAATCTTTAAAAGAGGTTTATGGGCTCGTATGGTTACTTGTTCCTATTTTTACTCCTGTATCGGGAATCATAATAGGGGTACTAGTAATTGTGTGGTTAGAAAGACAAATATCCGCAGGGATACAACAACGTATTGGACCTGAATACGCGGGTCCTTTGGGAATTCTTCAAGCTCTAGCAGATGGTACCAAATTACTTTTCAAAGAAGATCTTATCCCATCTAGAGGAGATATTAGTTTATTCAGTATCGGACCATCTATAGCGGTCATATCCATTTTACTAAGTTATTCAGTAATTCCTTTTGGCTATCACCTTGTTTTAGCCGATCTTAACATAGGAGTTTTCTTA…
>trnI-CAU_scaffold-blatN
GCATCCATGGCTGAATGGTTAAAGCGCCCAACTCATAATTGGCAAATTCGTAGGTTCAATTCCTGCTGGATGCA
>rpl22_scaffold-blatX
ATGATAAAGAGCGACCCGGATGTAGAAGTATACGCTTTAGGTCAACATATACGCATGTCTGCTCATAAAGCACGAAGAGTAATTGATCAGATTCGTGGGCGTCCCTACGAGGAAACACTTATGATACTAGAACTCATGCCTTATCGAGCATGTTATCCCATTTTAAAATTAGTTTATTCTGCAGCAGCAAATGCTAGTCACAATATGGGTTTCAACGAAACGGCTTTAATCATTAGTCAAGCCGAAGTTAATGAGGGTACTATCATTAAAAAGTTAAAACCCCGAGCTCGAGGACGTAGTTATCCGATAAAAAAACCTACCTGTCATATAACTATTGTATTGCAAGATATATCTAAAGATAAAAATTATTTCATATGGTTAAGAAAATATGGATGGATA…
>psaC_scaffold-blatX
ATGTCACATTCAGTAAAGATTTATGATACATGTATAGGGTGTACCCAATGTGTACGTGCCTGCCCCACGGATGTATTAGAAATGATACCCTGGGATGGATGTAAAGCTAAGCAAATTGCTTCCGCTCCAAGAACGGAAGACTGTGTAGGTTGTAAAAGGTGTGAATCCGCCTGTCCAACGGATTTCTTGAGTGTCCGGGTTTATTTATGGCATGAAACAACTCGTAGTATGGGTCTAGCTTATTGA
>psbK_scaffold-blatX
ATGCTTAATATCTTTAGTTTGATCTGTATCTATCTTAATTCTATACTTCATTCGAGTCATTTTTTCTTTGCCAAATTGCCCGAGGCTTATGCTTTTTTCAATCCAATCGTAGATGTTATGCCAGTGATACCTTTGTTTTTTTTTCTCTTAGCCTTTGTTTGGCAAGCTGCTGTAAGTTTTCGATAA
>ndhJ_scaffold-blatX
ATGCAGGGTCGTTTGTCTGCTTGGCTAGTCAAGCATAGGCTAGTTCATAGATCTTTGGGTTTCGATTACCAAGGAATAGAAACTTTACAAATAAAGCCCGAGGATTGGCACTCCATTGCTGTCATTTCATATGTATATGGTTACAATTATCTACGCTCCCAGTGTGCATATGATGTAGCACCGGGCGGGCTGTTAGCTAGTGTGTATCATCTTACGAGAATACAGTATGGTGTGGATCAACCAGAAGAGGTATGCATAAAAGTTTTTGCCCCAAGGATGAATCCTAGAATTCCGTCTGTTTTCTGGATTTGGAAAAGCGCAGATTTTCAAGAACGGGAATCTTATGATATGTTGGGAATCTCTTATGATAATCATCCACGCCTGAAACGTATTTTGATG…
>trnV-GAC_scaffold-blatN
AGGGATATAACTCAGCGGTAGAGTGTCACCTTGACGTGGTGGAAGTCATCAGTTCGAGCCTGATTATCCCTA
>trnL-CAA_scaffold-blatN
GCCTTGATGGTGAAATGGTAGACACGCGAGACTCAAAATCTCGTGCTAAAAAGCGTGGAGGTTCGAGTCCTCTTCAAGGCA
>trnI-GAU_scaffold-blatN
GGGCTATTAGCTCAGTGGTAGAGCGCGCCCCTGATAATTGCGTCGTTGTGCCTGGGCTGTGAGGGCTCTCAGCCACATGGATAGTTCAATGTGCTCATCAGCGCCTGACCCGGAGATGTGGATCATCCAAGGCACATTAGCATGGCGTACTCCTCCTGTTCGAACCGGAGTTTGAAACCAAACTTCTCCTCAGGAGGATAGATGGGGCGATTCAGGTGAGATCCAATGTAGATCCAACTTTCTATTCACTCGTGGGATCCGGGCGGTCCGGGGGGGACCACCAAGGCTCCTCTCTTCTCGAGAATCCATACATTCCTTATCAGTGTATGGACAGCTATCTCTCGAGCACAGGTTTAGGTTCGGCCTCAATGGTAAAATCAAATGGAGCACCTAACAACG…
>rpl20_scaffold-blatX
ATGACCAGAATTAGACGAGGGTATATAGCTCGGAGACGTAGAACAAAAATTCGTTTATTTGCATCAACCTTTCGAGGGACTCATTCAAGGCTTACTCGAACTACTATTCAACAGAAAATGAGAGCCTTAGTTTCTGCTCATCGGGATAGGGGCAGGCAAAAGAGAAATTTTCGTCGTTTGTGGATCACTCGGATAAATGCAGCAATTCGTGAAATTGGGGTATCCTATAGTTATAGTAGATCAATACATGATATGTACAAGAGGAAGTCGCTTATTAATCGTAAAATGCTTGCACAAATAGCCATATCAAATACGAATTGTCTTTACATGATTTCCAATAAGATCATTAAATAA
>trnfM-CAU_scaffold-blatN
CGCGGGGTAGAGCAGCTTGGTAGCTCGCAAGGCTCATAACCTTGAGGTCACGGGTTCAAATCCCGTCTCCGCAA
>ndhG_scaffold-blatX
ATGGATTTACCTGGACCAATACATGATTTTCTTTTAGTTTTTTTGGGATTGGGTCTTATAGTGGGAAGTCTAGGAGTGGTATTACTTACCAATCCAATTTTTTCTGCTTTTTCATTGGGATTAGTTCTTGTTTGTACATCCTTATTCCATATTCCATCGAACTCCCACTTTGTAGCTGCTGCGCAGCTACTTATTTATGTGGGAGCAATAAATGTATTAATTGTATTTGCTGTGATGTTCATGAATGGTTCAGAATATTACAAAGATTTCCATCTTTGGGCCGTTGGAGACGGAGTCACTTCACTGGTTTGTACAAGTATTTTTGTTTCACTAATTACTACTATCCCAGATACGTCATGGTACGGGATTGTTTGGACTACAAGATCAAACCAGATTATA…
>psbE_scaffold-blatX
ATGTCTGGAAGCACGGGAGAACGTTCTTTTGCTGATATTATCACCAGTATTCGATACTGGGTCATTCATAGCATTACTATACCTTCCCTATTCATTGCGGGTTGGTTATTCGTCAGCACGGGTTTAGCTTACGATGTGTTTGGAAGTCCTCGGCCAAACGAGTATTTTACAGAGAACCGACAAGGAATTCCATTAATAACTGGCCGTTTTGATTCTTTGGCGCAACTCGATGAATTTAGTAGATCCTTTTAG
>petG_scaffold-blatX
ATGATTGAAGTTTTACTATTTGGAATCGTGTTAGGCCTAATTCCTATTACTTTGGCTGGATTATTCGTAACTGCATATTTGCAATACAGGCGCGGCGATCAGTTGGACCTTTGA
>psaB_scaffold-blatX
ATGGCATTACGATTTCCAAGGTTTAGCCAAGGCTTAGCTCAGGACCCCACTACGCGTCGTATTTGGTTTGGTATTGCTACCGCACATGACTTCGAGAGTCATGATGATATTACTGAGGAACGTCTTTATCAGAATATTTTTGCTTCTCACTTCGGGCAGTTAGCAATAATTTTTTTGTGGACTTCCGGAAATCTGTTTCATGTAGCTTGGCAAGGAAATTTTGAGTCATGGGTACAGGACCCTTTACATGTAAGACCTATTGCTCATGCAATTTGGGATCCTCATTTTGGTCAACCGGCGGTAGAAGCCTTTACTCGAGGGGGTGCTCTCGGCCCAGTGAATATCGCTTATTCTGGTGTTTATCAGTGGTGGTATACAATCGGCTTACGCACTAATGAA…
>rps15_scaffold-blatX
ATGGTAAAAAATTTATTAATTTCAGTTATTTCGCAAGAAGAAAAAGAAGAAAATAAGGGATCTGTTGAATTTCAAGTATTCAGTTTCACCAATAAGATACGTAAACTTACTTCCCATTTAGAATTGCACAGAAAAGACTATTTATCTCAGAGAGGTCTACGGAAAATTCTGGGAAAACGTCAACGGCTGCTGGTTTATTTGTCAAAGAAAAATAGAGTACGTTATAAAGAATTAATTAGTCAATTGGATATACGGGAGCCAAAAACTCATTAA
>rpl14_scaffold-blatX
ATGATTCAACCTCAGACCTATTTAAATGTAGCGGACAACAGCGGGGCTAGAGAATTAATGTGTATTCGAATCATAGGAGCTAGTAATCGCCGATATGCTCATATTGGCGACGTTATTGTTGCTGTAATCAAAGAAGCAGTGCCCAATATGCCTCTACAAAGATCAGAAGTAATCAGAGCTGTAATTGTACGTACATGTAAAGAACTCAAACGTAACAACGGTATGATAATACAATATGATGACAATGCAGCAGTTGTCATTGATCAAGAAGGAAATCCAAAAGGAACTCGAGTTTTTGGTGCGATCACTCGGGAATTGAGACAGTTGAATTTTACTAAAATAGTCTCATTAGCTCCTGAGGTATTATAA
>petN_scaffold-blatX
ATGGATATAGTAAGTCTTGCTTGGGCTGCTTTAATGGTAGTCTTTACATTTTCCCTTTCACTCGTAGTATGGGGAAGAAGTGGACTCTAG
>ycf1_scaffold-blatX
ATGATTTTGAAATATTTTCTACTAGGTAATCTATTATCCTTATGCATGAAGATAATCAATTCGGTCGTTGTGGTCGGACTCTATTATGGATTTCTGACCACATTCTCCATAGGGCCCTCTTATCTCTTCCTTCTCCGAGCTCGGGTTATGAAAGAAGGAACCGAGAAGGAGGTATCAGCAACAACTGGTTTTATTGCGGGACAGCTCATGATGTTCATATCGATCTATTATGCGCCTCTGCATCTAGCATTGGGTAGACCTCATACAATAACTGTCCTAGTTCTACCGTATCTTTTGTTTCATTTCTTCTGGAACAATCACAAACACTTTTTTGATTATGGATCTACTACCAGAAATTCAATGCGTAATCTCAGCATTCAGTGTGTATTCTTGAATAAT…
>psaA_scaffold-blatX
ATGATTATTCGTTCGCCGGAATCAGAAGTTAAAATTTTGGTGGATAGGGATCCCGTAAAAACTTCTTTCGAGGAATGGGCCAGACCGGGTCATTTCTCAAGAACAATAGCGAAGGGCCCGGATACTACCACTTGGATCTGGAACCTACATGCCGATGCTCACGATTTTGATAGCCATACCAGTGATTTGGAGGAGATCTCTCGAAAAGTATTTAGTGCCCATTTCGGTCAACTCTCCATCATATTTCTTTGGCTGAGTGGCATGTATTTCCACGGTGCCCGTTTTTCCAATTATGAAGCATGGCTAAGCGATCCTACTCACATTGGACCCAGTGCCCAGGTGGTTTGGCCAATAGTGGGCCAAGAAATATTGAATGGTGATGTGGGCGGGGGTTTCCGA…
>trnG-UCC_scaffold-blatN
GCGGATATGGTTGAATGGTAAAATTTCTCTTTGCCAAGGAGAAGACGCGGGTTCGATTCCCGCTATCCGCC
